# Supplementary material for: Association of NICU Design on Neurodevelopmental Outcomes in Preterm Neonates Born at Less Than 29 Weeks’ Gestation: A Retrospective Observational Study
Source: Research Square preprint supplement (doi:10.21203/rs.3.rs-7383845/v1), 2025-09-03
Supplement: Supplementary file 1 [file bca793941b5e6b17bb054f3c.docx]

## **Supplementary- Table 2:** Demographic characteristics of subgroups based on followed up status

|  | **Open Bay (n=741)** | | | **Single Room (n=842)** | | |
| --- | --- | --- | --- | --- | --- | --- |
|  | FU infants (n=471) | Lost to FU survived infants (n=270) | **P value** | FU infants  (n=546) | Lost to FU survived infants (n=296) | **P value** |
| GA at birth, median (IQR) | 26 (25, 27) | 25 (24, 27) | <0.0001 | 26 (25, 27) | 26 (24, 27) | <0.0001 |
| Birth weight, median (IQR) | 900 (760, 1070) | 790 (630, 980) | <0.0001 | 870 (700, 1050) | 810 (630, 1015) | 0.003 |
| Sex (male) n (%) | 264/470 (56) | 148/270 (55) | 0.72 | 298/546 (55) | 152/296 (51) | 0.37 |
| multiples, n (%) | 129/471 (27) | 80/270 (30) | 0.51 | 145/546 (27) | 85/296 (29) | 0.50 |
| SGA, n (%) | 41/471 (9) | 23/270 (9) | 0.93 | 51/546 (9) | 31/296 (10) | 0.60 |
| Antenatal steroids, n (%) | 435/465 (94) | 228/269 (85) | 0.0001 | 513/546 (94) | 262/296 (89) | 0.005 |
| Antenatal MgSO4, n (%) | 238/461 (52) | 139/266 (52) | 0.87 | 477/546 (87) | 242/296 (82) | 0.03 |
| PPROM, n (%) | 104/468 (22) | 61/270 (23) | 0.91 | 188/546 (34) | 100/296 (34) | 0.85 |
| Maternal hypertension, n (%) | 72/467 (15) | 26/268 (10) | 0.03 | 101/546 (18) | 38/296 (13) | 0.03 |
| Outborn, n (%) | 47/471 (10) | 30/270 | 11 | 43/546 (8) | 27/296 (9) | 0.53 |
| C-Section, n (%) | 238/471 (51) | 114/270 (42) | 0.03 | 309/546 (57) | 149/296 (50) | 0.08 |
| DCC, n (%) | 170/296 (57) | 81/171 (47) | 0.04 | 329/544 (60) | 164/295 (56) | 0.17 |
| Chest compression or Epinephrine use in resuscitation, n (%) | 30/471 (6) | 33/270 (12) | 0.006 | 24/546 (4) | 22/296 (7) | 0.06 |
| 5 min APGAR, median (IQR) | 8 (6, 9) | 6 (4, 8) | <0.0001 | 8 (5, 9) | 7 (4, 9) | 0.004 |
| SNAPPE-II score median IQR | 24 (14, 40) | 37.5 (20, 60) | <0.0001 | 26 (15, 43) | 32 (15, 49) | 0.005 |
| Surfactant, n (%) | 359/471 (76) | 204/270 (76) | 0.84 | 391/546 (72) | 235/296 (79) | 0.01 |
| Systemic Steroids, n (%) | 23/471 (5) | 33/270 (12) | 0.0003 | 81/546 (15) | 66/296 (22) | 0.007 |
| Late onset sepsis, n (%) | 111/471 (24) | 61/270 (23) | 0.76 | 115/546 (21) | 82/296 (28) | 0.03 |

Notes: * Fisher’s exact test was used to obtain the p-value, instead of the Chi-square test

Unless stated otherwise, data are shown as number/total (percentage) or median (IQR).

GA: gestational age, PPROM: prolonged premature rupture of membranes, SNAP: score for neonatal acute physiology.

FU: Follow up; SGA: small for GA
