# Supplementary material for: Association of NICU Design on Neurodevelopmental Outcomes in Preterm Neonates Born at Less Than 29 Weeks’ Gestation: A Retrospective Observational Study
Source: Research Square preprint supplement (doi:10.21203/rs.3.rs-7383845/v1), 2025-09-03
Supplement: Supplementary file 2 [file e8b105f2dd05ebdf0d8c6f03.docx]

**Supplementary- Table 6:** Level of Neurodevelopmental Impairment-


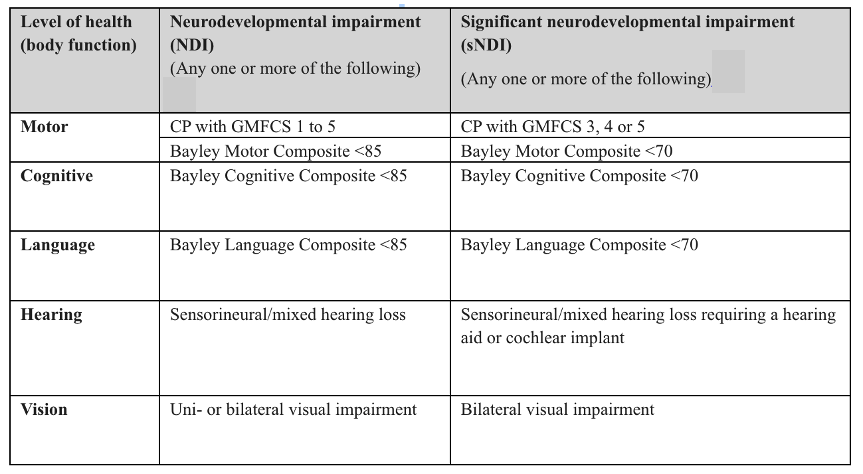


**Reference:** Synnes A, Luu TM, Moddemann D, Church P, Lee D, Vincer M, et al. Determinants of developmental outcomes in a very preterm Canadian cohort. Arch Dis Child Fetal Neonatal Ed. 2017;102(3):F235-F4.
